# Supplementary material for: The pivotal role of micro-environmental cells in a human blood–brain barrier in vitro model of cerebral ischemia: functional and transcriptomic analysis
Source: Springer Nature journal article supplement (doi:10.1186/s12987-020-00179-3), 2020-03-05
Supplement: MOESM1 [file 17774510]

Additional file 1

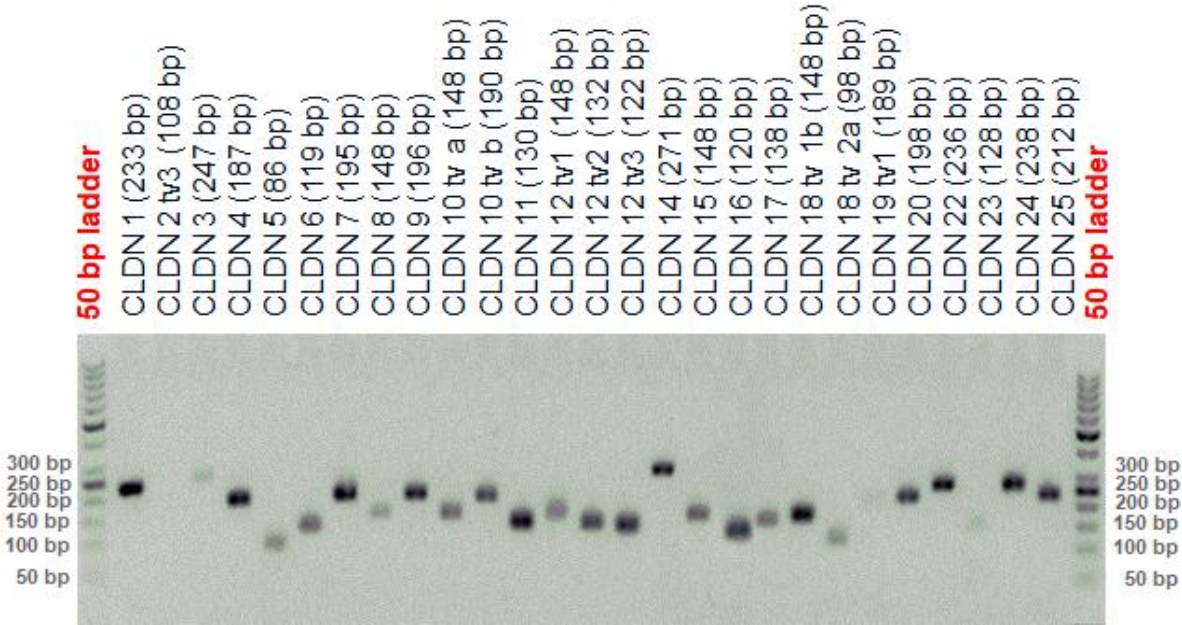

Figure S1: Agarose gel of PCR products for several claudins (CLDN) expressed in hCMEC/D3 cells, claudin-13 and -21 do not exist in human, claudin-2 and claudin-19 showed no significant expression in hCMEC/D3.
