# Supplementary material for: The pivotal role of micro-environmental cells in a human blood–brain barrier in vitro model of cerebral ischemia: functional and transcriptomic analysis
Source: Springer Nature journal article supplement (doi:10.1186/s12987-020-00179-3), 2020-03-05
Supplement: MOESM2 [file 17774510]

## Additional file 2

**Table S1:** Regulation of mRNA expression of barrier markers in hCMEC/D3 cells in mono- or co-culture with rat glioma C6 cells after OGD treatment (1% O<sub>2</sub>, 5 h) in DMEM - glucose or after subjection to DMEM + glucose in normoxia for 5 hours. Relative x-folds of mRNA expression normalized to mono-cultured hCMEC/D3 in normoxia are illustrated. Data presented as means ± SD, N=3, n=3 (pooling of four replicates in each different experiment was performed). As endogenous control β-actin was used. Calculated x-folds are shown as means ± standard deviation (SD). Statistical significance were indicated with \*: p<0.05 *versus* hCMEC/D3 + C6 normoxia, #: p<0.05 *versus* hCMEC/D3 OGD and §: p<0.05 *versus* hCMEC/D3 normoxia, one way-ANOVA and following Tukey post-hoc test, or Kruskal-Wallis one way-ANOVA on ranks if normal distribution of data set was not given. tv = transcript variant.

| Day 5       |                                        | EBM-2 0.25% FCS                             |                                   |                                        |
|-------------|----------------------------------------|---------------------------------------------|-----------------------------------|----------------------------------------|
| Day 6 – 5hr | hCMEC/D3<br>DMEM + glucose<br>normoxia | hCMEC/D3 + C6<br>DMEM + glucose<br>normoxia | hCMEC/D3<br>DMEM - glucose<br>OGD | hCMEC/D3 + C6<br>DMEM - glucose<br>OGD |
| CLDN1       | 1.00 ± 0.00                            | 1.05 ± 0.11                                 | 3.06 ± 0.21\$*                    | 1.86 ± 0.28\$*#                        |
| CLDN3       | 1.00 ± 0.00                            | 0.45 ± 0.24                                 | 0.29 ± 0.09§                      | 1.16 ± 0.47*#                          |
| CLDN4       | 1.00 ± 0.00                            | 0.95 ± 0.19                                 | 0.83 ± 0.07                       | 1.09 ± 0.26                            |
| CLDN5       | 1.00 ± 0.00                            | 0.80 ± 0.14                                 | 1.70 ± 0.10\$*                    | 2.29 ± 0.11\$*#                        |
| CLDN6       | 1.00 ± 0.00                            | 1.08 ± 0.38                                 | 1.37 ± 0.17                       | 1.37 ± 0.18                            |
| CLDN7       | 1.00 ± 0.00                            | 0.89 ± 0.06                                 | 0.78 ± 0.06§                      | 0.72 ± 0.05\$*                         |
| CLDN8       | 1.00 ± 0.00                            | 1.52 ± 1.04                                 | 3.98 ± 4.04                       | 5.40 ± 3.54                            |
| CLDN9       | 1.00 ± 0.00                            | 1.21 ± 0.38                                 | 2.08 ± 1.26                       | 3.25 ± 0.90§                           |
| CLDN10 tva  | 1.00 ± 0.00                            | 1.22 ± 1.07                                 | 3.70 ± 3.36                       | 5.41 ± 3.60                            |
| CLDN10 tvb  | 1.00 ± 0.00                            | 2.55 ± 1.31                                 | 4.59 ± 5.46                       | 7.06 ± 7.26                            |
| CLDN11      | 1.00 ± 0.00                            | 0.97 ± 0.06                                 | 0.94 ± 0.17                       | 0.58 ± 0.07\$*#                        |
| CLDN12 tv1  | 1.00 ± 0.00                            | 0.96 ± 0.17                                 | 1.26 ± 0.26                       | 1.06 ± 0.11                            |
| CLDN12 tv2  | 1.00 ± 0.00                            | 1.02 ± 0.08                                 | 1.77 ± 0.12\$*                    | 1.48 ± 0.11\$*#                        |
| CLDN12 tv3  | 1.00 ± 0.00                            | 1.09 ± 0.22                                 | 1.66 ± 0.15\$*                    | 1.58 ± 0.10\$*                         |
| CLDN14      | 1.00 ± 0.00                            | 1.05 ± 0.60                                 | 1.85 ± 0.97                       | 1.22 ± 0.75                            |
| CLDN15      | 1.00 ± 0.00                            | 0.97 ± 0.14                                 | 3.27 ± 0.42\$*                    | 1.82 ± 0.62#                           |
| CLDN16      | 1.00 ± 0.00                            | 0.79 ± 0.19                                 | 1.45 ± 0.11\$*                    | 0.70 ± 0.15#                           |
| CLDN17      | 1.00 ± 0.00                            | 1.72 ± 1.02                                 | 5.47 ± 7.00                       | 6.45 ± 4.94                            |
| CLDN18 tv1b | 1.00 ± 0.00                            | 1.18 ± 0.35                                 | 0.93 ± 0.07                       | 1.03 ± 0.46                            |
| CLDN18 tv2a | 1.00 ± 0.00                            | 1.78 ± 1.29                                 | 3.77 ± 3.03                       | 4.11 ± 2.32                            |
| CLDN20      | 1.00 ± 0.00                            | 0.98 ± 0.18                                 | 1.11 ± 0.24                       | 0.75 ± 0.08                            |
| CLDN22      | 1.00 ± 0.00                            | 1.11 ± 0.22                                 | 1.45 ± 0.24                       | 1.10 ± 0.19                            |
| CLDN23      | 1.00 ± 0.00                            | 1.09 ± 0.29                                 | 1.11 ± 0.46                       | 1.06 ± 0.42                            |
| CLDN24      | 1.00 ± 0.00                            | 0.95 ± 0.17                                 | 1.60 ± 0.35\$*                    | 1.12 ± 0.23                            |
| CLDN25      | 1.00 ± 0.00                            | 2.17 ± 1.28                                 | 6.66 ± 8.34                       | 7.25 ± 5.78                            |
| ZO-1        | 1.00 ± 0.00                            | 1.21 ± 0.16                                 | 1.74 ± 0.16\$*                    | 1.34 ± 0.09\$*#                        |
| ZO-2        | 1.00 ± 0.00                            | 1.12 ± 0.16                                 | 2.29 ± 0.18\$*                    | 1.85 ± 0.13\$*#                        |
| Occludin    | 1.00 ± 0.00                            | 1.28 ± 0.20                                 | 2.15 ± 0.22\$*                    | 1.25 ± 0.12#                           |
| CDH5        | 1.00 ± 0.00                            | 1.07 ± 0.13                                 | 1.43 ± 0.13\$*                    | 1.23 ± 0.10                            |
| JAM-1       | 1.00 ± 0.00                            | 1.05 ± 0.05                                 | 0.85 ± 0.10*                      | 0.83 ± 0.05\$*                         |
| JAM-2       | 1.00 ± 0.00                            | 1.24 ± 0.65                                 | 1.45 ± 0.94                       | 0.80 ± 0.30                            |
| JAM-3       | 1.00 ± 0.00                            | 0.98 ± 0.31                                 | 1.25 ± 0.28                       | 1.25 ± 0.15                            |
| Tricellulin | 1.00 ± 0.00                            | 0.84 ± 0.08                                 | 1.27 ± 0.14*                      | 1.05 ± 0.16                            |
| ABCB1       | 1.00 ± 0.00                            | 1.19 ± 0.13                                 | 1.82 ± 0.31\$*                    | 1.32 ± 0.16#                           |
| ABCC1       | 1.00 ± 0.00                            | 1.07 ± 0.07                                 | 1.45 ± 0.11\$*                    | 1.08 ± 0.13#                           |
| ABCC2       | 1.00 ± 0.00                            | 1.04 ± 0.15                                 | 1.33 ± 0.06                       | 1.59 ± 0.27\$*                         |
| ABCC3       | 1.00 ± 0.00                            | 1.03 ± 0.10                                 | 0.71 ± 0.15*                      | 0.62 ± 0.13\$*                         |
| ABCC4       | 1.00 ± 0.00                            | 1.19 ± 0.13                                 | 0.67 ± 0.03\$*                    | 0.52 ± 0.09\$*                         |
| ABCC5       | 1.00 ± 0.00                            | 1.09 ± 0.25                                 | 1.79 ± 0.04\$*                    | 1.31 ± 0.11#                           |
| ABCG2       | 1.00 ± 0.00                            | 0.94 ± 0.04                                 | 1.37 ± 0.29*                      | 0.97 ± 0.09                            |
| SLC2A1      | 1.00 ± 0.00                            | 0.98 ± 0.04                                 | 5.10 ± 0.77*                      | 1.79 ± 0.10                            |
| VEGFa       | 1.00 ± 0.00                            | 0.90 ± 0.14                                 | 4.78 ± 0.96*                      | 2.20 ± 0.26                            |
