# Supplementary material for: The pivotal role of micro-environmental cells in a human blood–brain barrier in vitro model of cerebral ischemia: functional and transcriptomic analysis
Source: Springer Nature journal article supplement (doi:10.1186/s12987-020-00179-3), 2020-03-05
Supplement: MOESM3 [file 17774510]

### Additional file 3

**Table S2:** Regulation of mRNA expression of barrier markers in hCMEC/D3 cells in mono- or co-culture with astrocytes and pericytes after OGD treatment (0.1% O<sub>2</sub>, 5 h) in DMEM - glucose or after subjection to DMEM + glucose in normoxia for 5 hours. Relative x-folds of mRNA expression normalized to mono-cultured hCMEC/D3 in normoxia are illustrated. Data presented as means  $\pm$  SD, N=3, n=3 (pooling of four replicates in each different experiment was performed). As endogenous control  $\beta$ -actin was used. Calculated x-folds are shown as means  $\pm$  standard deviation (SD). Statistical significance were indicated with \*: p<0.05 *versus* hCMEC/D3 + hA/hP normoxia, #: p<0.05 *versus* hCMEC/D3 OGD and §: p<0.05 *versus* hCMEC/D3 normoxia, one way-ANOVA and following Tukey post-hoc test, or Kruskal-Wallis one way-ANOVA on ranks if normal distribution of data set was not given. tv = transcript variant.

| Day 5       |                                        | EBM-2 0.25% FCS                                |                                   |                                           |
|-------------|----------------------------------------|------------------------------------------------|-----------------------------------|-------------------------------------------|
| Day 6 – 5hr | hCMEC/D3<br>DMEM + glucose<br>normoxia | hCMEC/D3 + hA/hP<br>DMEM + glucose<br>normoxia | hCMEC/D3<br>DMEM - glucose<br>OGD | hCMEC/D3 + hA/hP<br>DMEM - glucose<br>OGD |
| CLDN1       | 1.00 ± 0.00                            | 0.64 ± 0.10                                    | 1.31 ± 0.59                       | 1.14 ± 0.26                               |
| CLDN3       | 1.00 ± 0.00                            | 1.13 ± 0.46                                    | 0.55 ± 0.14*                      | 0.90 ± 0.61                               |
| CLDN4       | 1.00 ± 0.00                            | 0.94 ± 0.13                                    | 0.63 ± 0.04*                      | 0.87 ± 0.19                               |
| CLDN5       | 1.00 ± 0.00                            | 0.66 ± 0.13                                    | 0.99 ± 0.26                       | 1.60 ± 0.65                               |
| CLDN6       | 1.00 ± 0.00                            | 0.76 ± 0.13                                    | 1.08 ± 0.09                       | 1.12 ± 0.26                               |
| CLDN7       | 1.00 ± 0.00                            | 0.92 ± 0.12                                    | 0.89 ± 0.04                       | 0.87 ± 0.09                               |
| CLDN8       | 1.00 ± 0.00                            | 1.33 ± 1.07                                    | 2.17 ± 2.79                       | 8.15 ± 13.14                              |
| CLDN9       | 1.00 ± 0.00                            | 0.62 ± 0.06                                    | 0.67 ± 0.30                       | 0.87 ± 0.52                               |
| CLDN10 tva  | 1.00 ± 0.00                            | 1.03 ± 0.66                                    | 1.07 ± 1.07                       | 4.99 ± 7.45                               |
| CLDN10 tvb  | 1.00 ± 0.00                            | 0.45 ± 0.18                                    | 0.48 ± 0.24                       | 1.25 ± 1.78                               |
| CLDN11      | 1.00 ± 0.00                            | 0.77 ± 0.18                                    | 0.67 ± 0.18                       | 0.52 ± 0.10§                              |
| CLDN12 tv1  | 1.00 ± 0.00                            | 0.86 ± 0.17                                    | 1.59 ± 0.25§*                     | 1.30 ± 0.21                               |
| CLDN12 tv2  | 1.00 ± 0.00                            | 0.92 ± 0.18                                    | 1.26 ± 0.07                       | 1.16 ± 0.19                               |
| CLDN12 tv3  | 1.00 ± 0.00                            | 0.88 ± 0.09                                    | 1.16 ± 0.27                       | 1.15 ± 0.09                               |
| CLDN14      | 1.00 ± 0.00                            | 0.80 ± 0.37                                    | 0.83 ± 0.28                       | 0.87 ± 0.14                               |
| CLDN15      | 1.00 ± 0.00                            | 0.68 ± 0.14                                    | 1.53 ± 0.44*                      | 1.39 ± 0.29                               |
| CLDN16      | 1.00 ± 0.00                            | 0.61 ± 0.09                                    | 1.20 ± 0.51                       | 0.77 ± 0.19                               |
| CLDN17      | 1.00 ± 0.00                            | 0.86 ± 0.57                                    | 0.96 ± 0.31                       | 2.66 ± 3.65                               |
| CLDN18 tv1b | 1.00 ± 0.00                            | 0.83 ± 0.22                                    | 0.50 ± 0.18§                      | 0.54 ± 0.25                               |
| CLDN18 tv2a | 1.00 ± 0.00                            | 0.75 ± 0.34                                    | 0.75 ± 0.31                       | 1.72 ± 2.23                               |
| CLDN20      | 1.00 ± 0.00                            | 0.78 ± 0.31                                    | 1.04 ± 0.10                       | 0.70 ± 0.21                               |
| CLDN22      | 1.00 ± 0.00                            | 0.74 ± 0.11§                                   | 0.79 ± 0.08§                      | 0.60 ± 0.05§#                             |
| CLDN23      | 1.00 ± 0.00                            | 0.95 ± 0.32                                    | 0.79 ± 0.46                       | 1.03 ± 0.59                               |
| CLDN24      | 1.00 ± 0.00                            | 0.69 ± 0.18§                                   | 0.77 ± 0.14                       | 0.47 ± 0.07§                              |
| CLDN25      | 1.00 ± 0.00                            | 0.90 ± 0.63                                    | 0.82 ± 0.40                       | 2.06 ± 2.11                               |
| ZO-1        | 1.00 ± 0.00                            | 0.88 ± 0.02                                    | 0.96 ± 0.09                       | 0.86 ± 0.09                               |
| ZO-2        | 1.00 ± 0.00                            | 0.90 ± 0.11                                    | 1.55 ± 0.43*                      | 1.25 ± 0.15                               |
| Occludin    | 1.00 ± 0.00                            | 0.88 ± 0.17                                    | 1.71 ± 0.12§*                     | 1.13 ± 0.03#                              |
| CDH5        | 1.00 ± 0.00                            | 0.82 ± 0.19                                    | 1.13 ± 0.25                       | 1.26 ± 0.17                               |
| JAM-1       | 1.00 ± 0.00                            | 1.05 ± 0.10                                    | 0.76 ± 0.02§*                     | 0.85 ± 0.14                               |
| JAM-2       | 1.00 ± 0.00                            | 0.72 ± 0.22                                    | 0.95 ± 0.53                       | 0.78 ± 0.22                               |
| JAM-3       | 1.00 ± 0.00                            | 0.83 ± 0.09                                    | 0.95 ± 0.10                       | 0.90 ± 0.13                               |
| Tricellulin | 1.00 ± 0.00                            | 0.87 ± 0.10                                    | 1.06 ± 0.14                       | 0.96 ± 0.13                               |
| ABCB1       | 1.00 ± 0.00                            | 1.00 ± 0.00                                    | 1.18 ± 0.50                       | 1.19 ± 0.35                               |
| ABCC1       | 1.00 ± 0.00                            | 0.99 ± 0.10                                    | 0.97 ± 0.18                       | 0.88 ± 0.03                               |
| ABCC2       | 1.00 ± 0.00                            | 0.68 ± 0.12                                    | 0.76 ± 0.25                       | 1.36 ± 0.52                               |
| ABCC3       | 1.00 ± 0.00                            | 0.98 ± 0.18                                    | 0.64 ± 0.13§                      | 0.79 ± 0.13                               |
| ABCC4       | 1.00 ± 0.00                            | 0.98 ± 0.12                                    | 0.63 ± 0.02§*                     | 0.57 ± 0.05*§                             |
| ABCC5       | 1.00 ± 0.00                            | 0.85 ± 0.20                                    | 0.87 ± 0.05                       | 0.80 ± 0.14                               |
| ABCG2       | 1.00 ± 0.00                            | 1.01 ± 0.07                                    | 1.08 ± 0.20                       | 1.00 ± 0.13                               |
| SLC2A1      | 1.00 ± 0.00                            | 0.82 ± 0.16                                    | 3.40 ± 1.10§*                     | 1.81 ± 0.53                               |
| VEGFa       | 1.00 ± 0.00                            | 0.74 ± 0.32                                    | 2.64 ± 1.38                       | 1.87 ± 0.83                               |
