# Supplementary material for: The pivotal role of micro-environmental cells in a human blood–brain barrier in vitro model of cerebral ischemia: functional and transcriptomic analysis
Source: Springer Nature journal article supplement (doi:10.1186/s12987-020-00179-3), 2020-03-05
Supplement: MOESM5 [file 17774510]

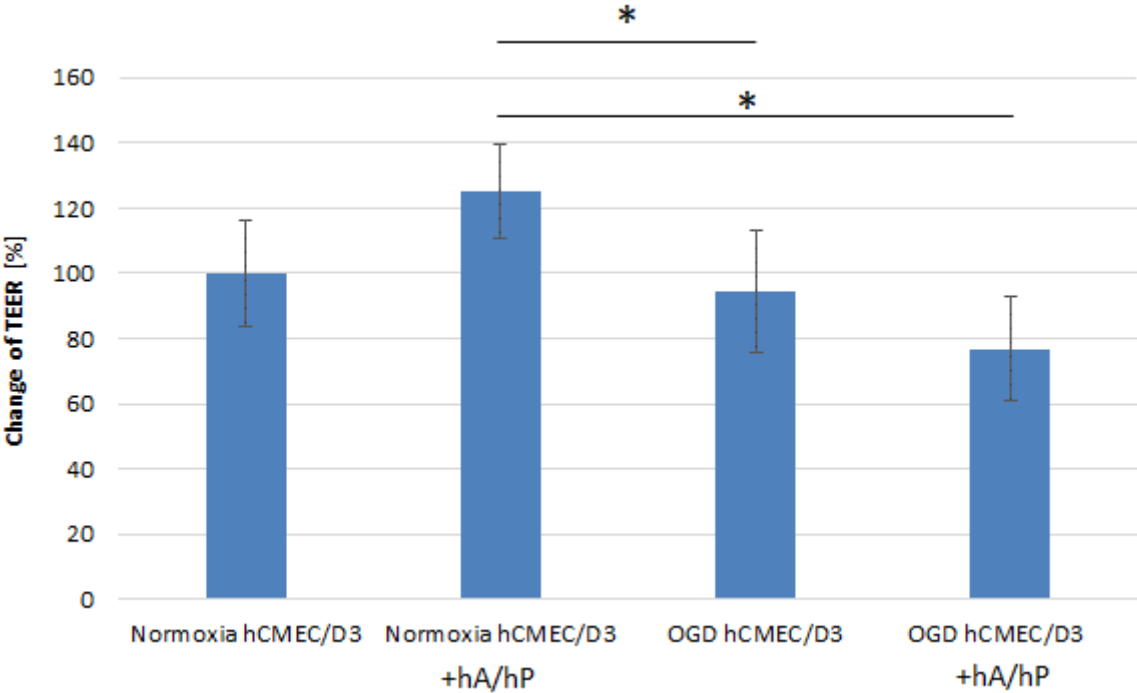

Figure S3: Influence of five hours OGD (1% O<sub>2</sub>) on barrier functionality of hCMEC/D3 in mono-culture and in co-culture with astrocytes and pericytes (hA/hP) measured by TEER (n=4 inserts). Data presented as means ± SD. Statistical significance (p < 0.05, t-test when equal variances were given, Mann-Whitney rank sum test when no normal distribution of data was given) was labelled with an asterisk (\*).
